# Supplementary material
Source: MDPI journal article supplement (https://www.mdpi.com/2411-5118/2/4/37)
Supplement: s1 [file s1]

## Supplementary S1

### The Sexting Questionnaire 2017

#### DEMOGRAPHICS

1. In which country are you?

2. What is your age? years

3. What is your gender?

Male

Female

Other

4. What is your sexual orientation?

Heterosexual

Homosexual

Bisexual

Do not want to say

5. Are you sexually active?

Yes

No

5a. If yes, at what age did you become sexually active?

#### SEXTING BEHAVIOURS

##### RECEIVING

6. Have you ever received sexually explicit images via text message or mobile app?

Yes

No

6a. If yes, how many times have you received sexually explicit pictures via text message or mobile app?

1-2 times

3-5 times

6-10 times

11 TO 25 times

More than 25 times

6b. From whom did you receive the sexually explicit images sent via text message or mobile app? (You may select as many items as applicable)

Friend (same sex)

Friend (opposite sex)

Boyfriend/girlfriend

Someone you just met

Someone you only knew online

6c. How did you feel after having received the sexually explicit image via text message or mobile app? (You may select as many items as applicable)

Aroused

Curious

Upset

Embarrassed

Afraid

Ashamed

Amused

Angry

Other

6d. Have you ever received sexually explicit images of another person via text message or mobile app that were unwanted/unwelcome?

Yes

No

6e. If yes, what action, if any, did you take? (You may select as many items as applicable)

Ignored it (no action taken)

Told a friend

Told a parent

Told a teacher

Told person directly not to do it

Reported it to the police

Other

7. Have you ever asked someone to send you a sexually explicit image of themselves via text or mobile app?

Yes

No

#### DISSEMINATION

8. Have you ever received a sexually explicit image sent via text or mobile app intended for yourself which you subsequently showed/sent to another person?

Yes

No

8a. If yes, what were the reasons why you decided to share the sext message with others? (You may select more than one answer).

As a joke, to be funny

To get attention/praise

Because another person asked you to

Because you felt pressured to do so

To improve your social status amongst peers

To get the recipient into trouble

To get back at the person

I did not think it was a big deal

Other

#### DISSEMINATION RECEIPT

9. Has someone ever forwarded you a sexually explicit image via text or mobile app that was not originally intended for you?

Yes

No

#### SENDING

10. Have you ever sent sexually explicit images of yourself via text message or mobile app?

Yes

No

10a. If yes, how many times have you sent sexually explicit images of yourself via text message or mobile app?

1-2 times

3-5 times

6-10 times

11 TO 25 times

More than 25 times

10b. If yes, whom did you send the sexually explicit images of yourself to? (You may select as many items as applicable)

Friend (same sex) Friend (opposite sex) Boyfriend/girlfriend Someone you just met Someone you only knew online

10c. If you have sent a sexually explicit image of yourself to another person, were drugs or alcohol contributing factors to your decision to do so?

Yes

No

10d. If you have sent sexually explicit images of yourself via text or mobile app to another person what was the reason/s? (You may select as many items as applicable)

As a form of self-expression

As a joke, to be funny

To get attention/praise

To be flirtatious/fun

To be sexy/initiate sexual activity

Because another person asked you to

Because you felt pressured to do so

To improve your social status amongst peers

Bullying/harassment

To get the recipient into trouble      Other reason      Don't know

10e. Have you ever consented to sexting (sent a sexually explicit image via text or mobile app) when you actually did not want to sext?

Yes

No

11. Are you aware of any negative consequences that may arise as a result of sending/receiving sexually explicit images via text message or mobile app? (You may select as many items as applicable)

Bullying/Harassment

Blackmail

Legal consequences

Affecting job prospects

Affecting current romantic relationship

Affected relationship with parents

Showing/sending of the image without your consent  
Other

12. Have you ever accidentally sent a sexually explicit image of yourself via text message or a mobile app, to a person other than the intended recipient?

Yes

No

13. Have you ever considered sending a sexually explicit image of yourself to another person via text message or mobile app and decided against it?

Yes

No

13a. If yes, what was your reason for deciding against it?

Fear of legal consequences

Getting into trouble at school

Fear of parents finding out

Not liking my body enough

Fear of response of others

Fear of it being sent to a third party

Not liking being pressured into it

Other

Don't want to say

14. Have you, or someone else you know, experienced negative consequences as a result of sending sexually explicit images of themselves to another person via text message or mobile app?

Yes

No

14a. If yes, who experienced these negative consequences?

Self

Other person

14b. If yes, what negative consequences were experienced? (You may select as many items as applicable)

Bullying/Harassment

Blackmail

Legal consequences

Affecting job prospects

Affecting current relationship

Affected relationship with parents

Other

Showing/sending of the image without your consent

## SUBJECTIVE NORMS AND ATTITUDES

Response options:

Likert 5 point – strongly disagree, disagree, neither agree nor disagree, agree, strongly agree

- Forwarding sexually explicit images via text or mobile app is no big deal
- Forwarding sexually explicit images via text or mobile app can have serious negative consequences\*
- Sexually explicit images via text or mobile app usually end up being seen by more than just those to whom they were sent\*
- Females have to worry more than males about sexually explicit images of themselves being viewed or distributed via text or mobile app to someone other than they were intended for.
- Sharing sexually explicit images via text or mobile app of others can enhance social status.

6. After a relationship breakdown, it is acceptable to forward sexually explicit images of your ex via text or mobile app to others.
7. Forwarding or sharing sexually explicit images of others via text or mobile app can be funny.

#### **ATTITUDES ABOUT DATING AND SEXUAL RELATIONSHIPS MEASURE**

Ward, L. M., and Rivadeneyra, R. (1999). Contributions of entertainment television to adolescents' sexual attitudes and expectations: The role of viewing amount versus viewer involvement. *J. Sex Res.* 36: 237–249.

Name of Subscale being used: "Women are Sex Objects"

Items:

1. An attractive woman should expect sexual advances and should learn how to handle them.
2. Women should be more concerned about their appearance than men.
3. Using her body and looks is the best way for a woman to attract a man.
4. Women should spend a lot of time trying to be pretty; no one wants to date a woman that has "let herself go."
5. There's nothing wrong with men whistling at shapely women.
6. It bothers me when a man is interested in a woman only if she is pretty. (This item is reverse coded)
7. There is nothing wrong with men being primarily interested in a woman's body.
8. Being with an attractive woman gives a man prestige.

#### **BODY PARTS**

Responses: Responses are made using a 6-point scale from 1 (strongly disagree) to 6 (strongly agree).

Important Note: This scale should only appear for participants who select heterosexual as their sexual orientation.

Instructions: On this page are listed a number of body parts and functions. Please read each item and indicate how you feel about this part or function of your own body

- 1 = Have strong negative feelings
- 2 = Have moderate negative feelings
- 3 = Have no feeling one way or the other
- 4 = Have moderate positive feelings
- 5 = Have strong positive feelings

1. Body scent
2. Appetite
3. Nose
4. physical stamina
5. Reflexes
6. Lips
7. muscular strength
8. Waist
9. energy level
10. Thighs
11. Ears
12. Biceps
13. Chin
14. body build
15. physical coordination
16. Buttocks
17. Agility
18. width of shoulders
19. Arms
20. chest or breasts
21. appearance of eyes
22. cheeks/cheekbones
23. Hips
24. Legs
25. figure or physique

26. sex drive
27. Feet
28. sex organs
29. appearance of stomach
30. Health
31. sex activities
32. body hair
33. physical condition
34. face
35. Weight

#### **BRIEF EMOTIONAL INTELLIGENCE SCALE BEIS-10**

Test Format: Items on the Brief Emotional Intelligence Scale are rated on a 5-point Likert scale anchored by 1 = "strongly agree" to 5 = "strongly disagree".

##### Appraisal of own emotions

1. \_\_\_\_ I know why my emotions change
2. \_\_\_\_ I easily recognize my emotions as I experience them

##### Appraisal of others' emotions

3. \_\_\_\_ I can tell how people are feeling by listening to the tone of their voice
4. \_\_\_\_ By looking at their facial expressions, I recognize the emotions people are experiencing

##### Regulation of own emotions

5. \_\_\_\_ I seek out activities that make me happy
6. \_\_\_\_ I have control over my emotions

##### Regulation of others' emotions

7. \_\_\_\_ I arrange events others enjoy
8. \_\_\_\_ I help other people feel better when they are down

##### Utilization of emotions

9. \_\_\_\_ When I am in a positive mood, I am able to come up with new ideas
10. \_\_\_\_ I use good moods to help myself keep trying in the face of obstacles

#### **RATIONAL-EXPERIENTIAL INVENTORY (REI)**

Items on the Rational-Experiential Inventory (REI) are rated on a 5-point Likert scale anchored by 1 = "definitely not true of myself" to 5 = "definitely true of myself."

##### Rational Engagement/Need for Cognition

1. \_\_\_\_ I don't like to have to do a lot of thinking. (R)
2. \_\_\_\_ I try to avoid situations that require thinking in depth about something. (R)
3. \_\_\_\_ I prefer to do something that challenges my thinking abilities rather than something that requires little thought.
4. \_\_\_\_ I prefer complex to simple problems.
5. \_\_\_\_ Thinking hard and for a long time about something gives me little satisfaction.

#### **EXPERIENTIAL ENGAGEMENT/FAITH IN INTUITION**

1. \_\_\_\_ I trust my initial feelings about people.
2. \_\_\_\_ I believe in trusting my hunches.
3. \_\_\_\_ My initial impressions of people are almost always right.
4. \_\_\_\_ When it comes to trusting people, I can usually rely on my 'gut feelings'.
5. \_\_\_\_ I can usually feel when a person is right or wrong even if I can't explain how I know.

(R) = reverse coded

### DIFFERENTIATION OF SELF INVENTORY – SHORT FORM (DRAKE ET AL, 2015)

| Subscale            | Item no. | Question                                                                                            | Rating                                                                                                                |
|---------------------|----------|-----------------------------------------------------------------------------------------------------|-----------------------------------------------------------------------------------------------------------------------|
| I-Position (IP)     | 4        | I tend to remain pretty calm even under stress                                                      | How much is the statement generally true of you;<br><br>Likert scale 1 (not at all true of me) to 6 (very true of me) |
|                     | 7        | No matter what happens in my life, I know that I'll never lose my sense of who I am                 |                                                                                                                       |
|                     | 11       | I usually do not change my behaviour simply to please another person                                |                                                                                                                       |
|                     | 23       | I'm fairly self-accepting                                                                           |                                                                                                                       |
|                     | 35       | My self esteem really depends on how other think of me                                              | REVERSED SCORED                                                                                                       |
|                     | 43       | I tend to feel pretty stable under stress                                                           | We could leave this, at it's similar to the first item in IP                                                          |
|                     | 27       | I am able to say no to others even when I feel pressured by them (this is also linked to coercion). | This item not in the DSI-SF but is in the DSI-R (I think it is important in linking to coercion and self)             |
| Fusion of Self (FO) | 5        | I'm likely to smooth over or settle conflicts between two people whom I care about                  | REVERSED SCORED                                                                                                       |
|                     | 13       | Whenever there is a problem in my relationship, I'm anxious to get it settled right away            | REVERSED SCORED                                                                                                       |
|                     | 17       | It's important for me to keep in touch with my parents regularly                                    | REVERSED SCORED                                                                                                       |
|                     | 25       | I try to live up to my parents expectations                                                         | REVERSED SCORED                                                                                                       |
|                     | 44       | Sometimes I feel sick after arguing with my partner                                                 | REVERSED SCORED                                                                                                       |

### PORNOGRAPHY CONSUMPTION QUESTIONNAIRE (Hald 2006).

#### SUB SCALE - PORNOGRAPHY CONSUMPTION

- . Ever watched pornography  
Yes No
- . If Yes: Have watched pornography within the last  
6 months  
Month  
Week  
24 hours
- . Frequency of use  
Less than once a month  
1-2 times per month  
1-2 times per week  
3 times per week or more
- 4. Age at first exposure (years)<sup>a</sup> M
- 5. Average time of use per week (minutes)<sup>a</sup>

### HYPERSEXUAL DISORDER

Please answer the following questions in context of the past 6 months.

- . A1. I have spent a great amount of time consumed by sexual fantasies and urges as well as planning for and engaging in sexual behavior.  
0 never true   1 Rarely   2 Sometimes   3 frequently   4 almost always true
- . A2. I have used sexual fantasies and sexual behavior to cope with difficult feelings (e.g., worry, sadness, boredom, frustration, guilt, or shame).  
0 never true   1 Rarely   2 Sometimes   3 frequently   4 almost always true
- . A3. I have used sexual fantasies and sexual behavior to avoid, put off, or cope with stresses and other difficult problems or responsibilities in my life.  
0 never true   1 Rarely   2 Sometimes   3 frequently   4 almost always true
- . A4. I have tried to reduce or control the frequency of sexual fantasies, urges, and behavior but I have not been very successful.  
0 never true   1 Rarely   2 Sometimes   3 frequently   4 almost always true
- . A5. I have continued to engage in risky sexual behavior that could or has caused injury, illness, or emotional damage to myself, my sexual partner(s), or a significant relationship.  
0 never true   1 Rarely   2 Sometimes   3 frequently   4 almost always true
- . B1. Frequent and intense sexual fantasies, urges and behavior have made me feel very upset or bad about myself (e.g., feelings of shame, guilt, sadness, worry, or disgust) or I tried to keep my sexual behavior a secret.  
0 never true   1 Rarely   2 Sometimes   3 frequently   4 almost always true
- . B2. Frequent and intense sexual fantasies, urges, and behavior have caused significant problems for me in personal, social, work, or other important areas of my life.  
0 never true   1 Rarely   2 Sometimes   3 frequently   4 almost always true

#### **DARK TRIAD (JONASON & WEBSTER, 2010) – DIRTY DOZEN**

All measures used a response scale from 1 (strongly disagree) to 9 (strongly agree).

1. I tend to manipulate others to get my way. \_
2. I have used deceit or lied to get my way.
3. I have use flattery to get my way.
4. I tend to exploit others towards my own end.
5. I tend to lack remorse.
6. I tend to be unconcerned with the morality of my actions.
7. I tend to be callous or insensitive.
8. I tend to be cynical.
9. I tend to want others to admire me.
10. I tend to want others to pay attention to me.
11. I tend to seek prestige or status.
12. I tend to expect special favours from others.
